# Supplementary figures and images for: Combining hyperspectral imaging and electrochemical sensing for detection of Pseudomonas aeruginosa through pyocyanin production
Source: Royal Society of Chemistry journal article supplement (doi:10.1039/d2sd00044j), 2022-01-01

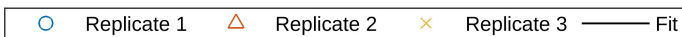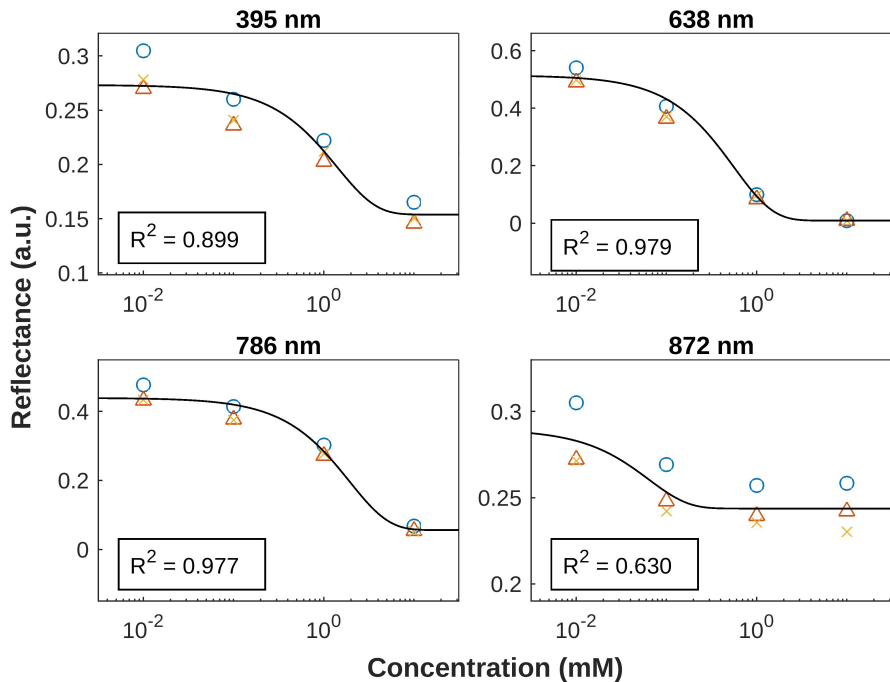

Supplement: d2sd00044j2.pdf [file d2sd00044j2.pdf]

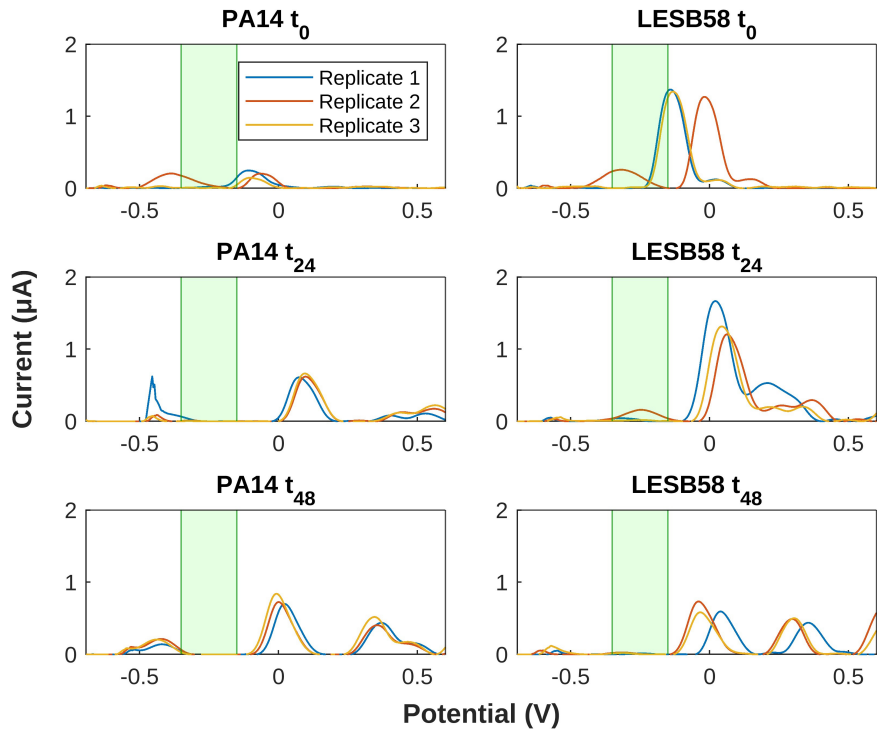

Supplement: d2sd00044j3.pdf [file d2sd00044j3.pdf]

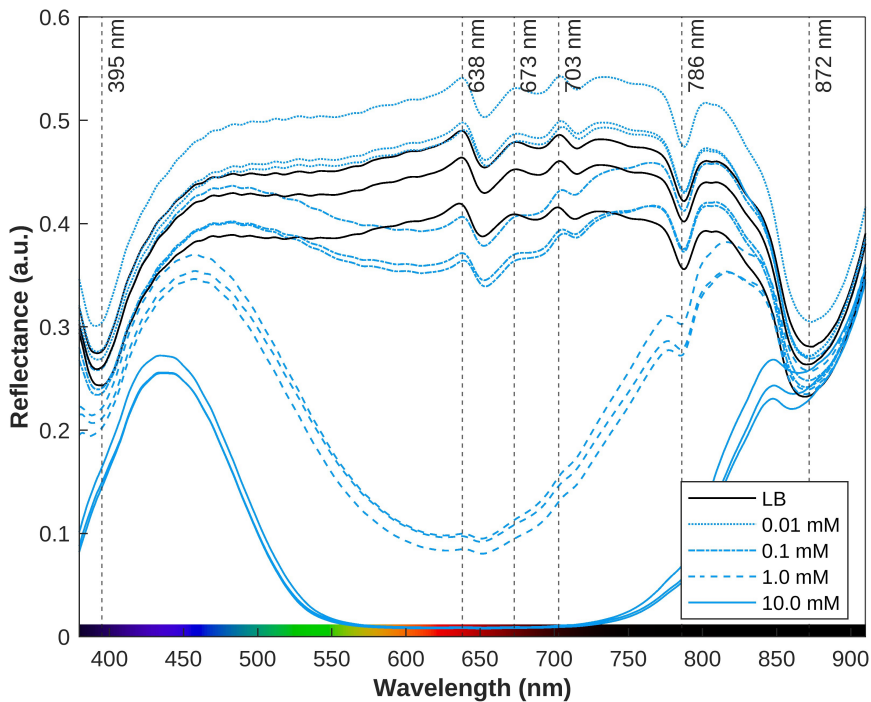

Supplement: d2sd00044j4.pdf [file d2sd00044j4.pdf]

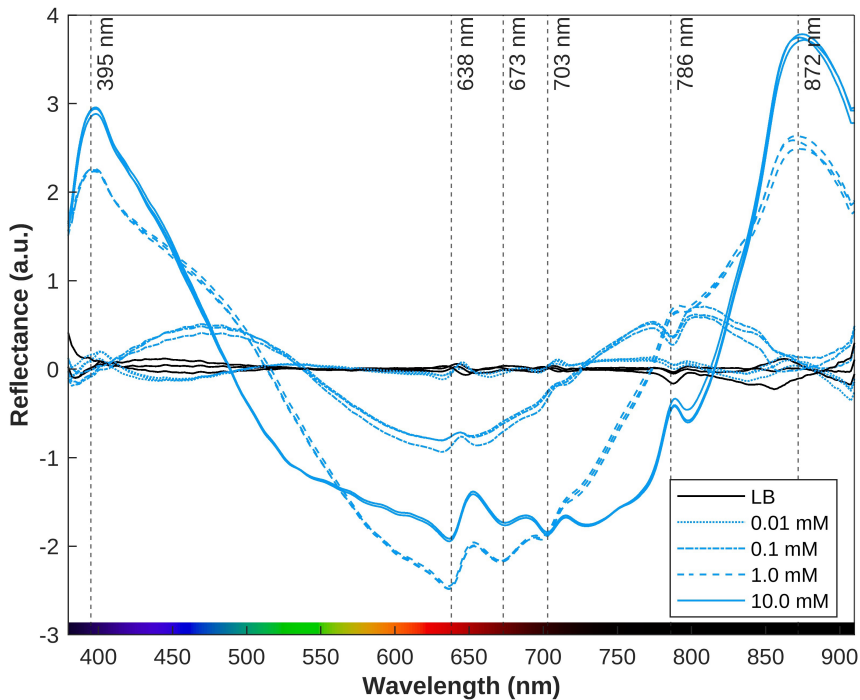

Supplement: d2sd00044j5.pdf [file d2sd00044j5.pdf]

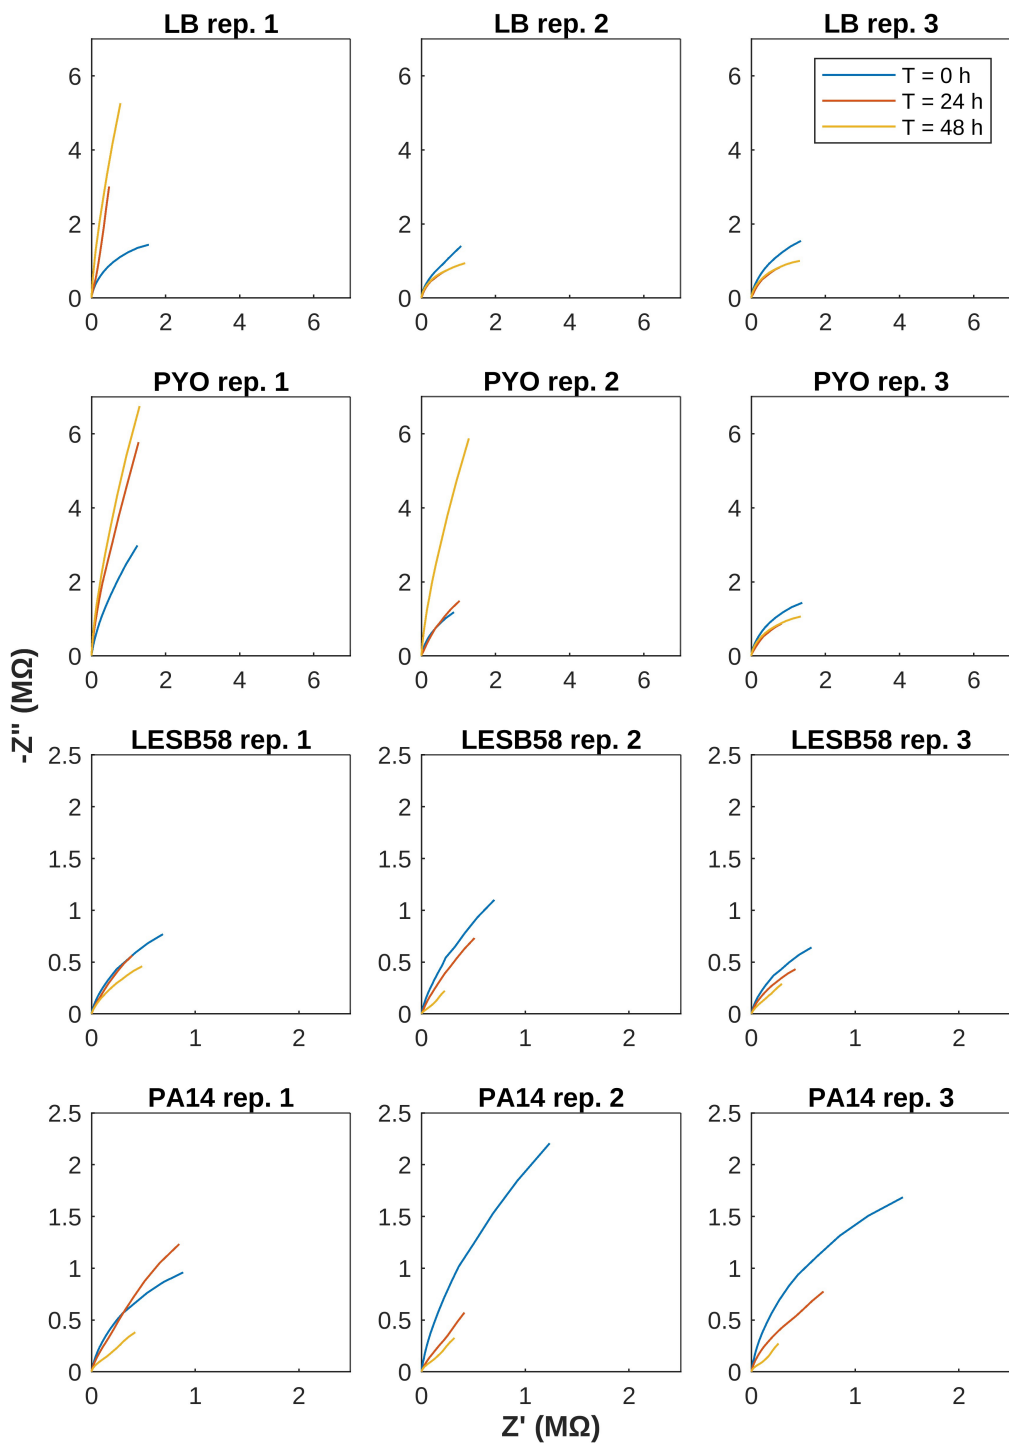

Supplement: d2sd00044j6.pdf [file d2sd00044j6.pdf]
